# Supplementary material for: Neandertal Introgression Sheds Light on Modern Human Endocranial Globularity
Source: PubMed Central journal article supplement — Curr Biol. Author manuscript; Available in PMC 2020 Jan 7. (PMC6380688; doi:10.1016/j.cub.2018.10.065), 2018-12-13
Supplement: NIHMS1516532-supplement-1.pdf [file NIHMS1516532-supplement-1.pdf]

**Current Biology, Volume 29**

## **Supplemental Information**

### **Neandertal Introgression Sheds Light on Modern Human Endocranial Globularity**

**Philipp Gunz, Amanda K. Tilot, Katharina Wittfeld, Alexander Teumer, Chin Yang Shapland, Theo G.M. van Erp, Michael Dannemann, Benjamin Vernot, Simon Neubauer, Tulio Guadalupe, Guillén Fernández, Han G. Brunner, Wolfgang Enard, James Fallon, Norbert Hosten, Uwe Völker, Antonio Profico, Fabio Di Vincenzo, Giorgio Manzi, Janet Kelso, Beate St. Pourcain, Jean-Jacques Hublin, Barbara Franke, Svante Pääbo, Fabio Macciardi, Hans J. Grabe, and Simon E. Fisher**

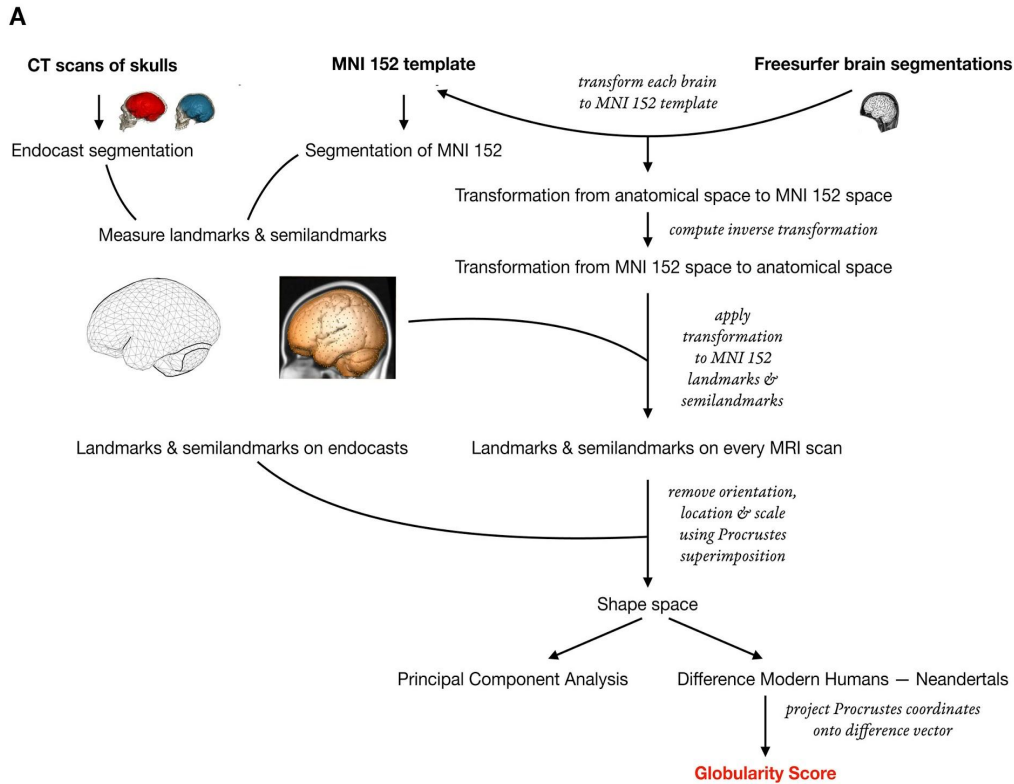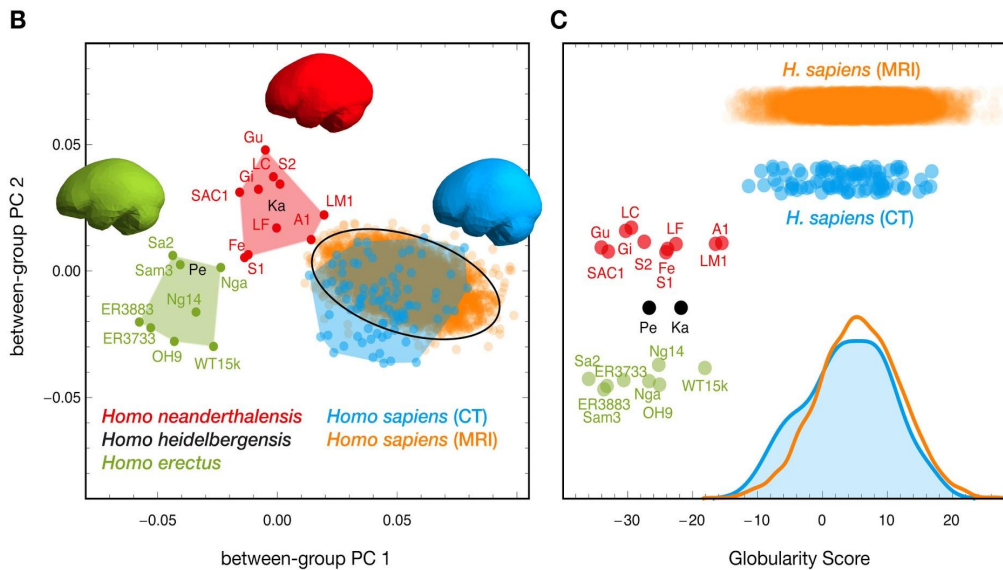

**Figure S1. Globularity scores building on data published in [S1], Related to Figure 2. (A)** Flowchart of the computations. **(B)** Between-group principal component (PC) analysis of endocranial shape: convex hulls are shown for modern human CT scans (blue;  $n=89$ ), Neandertals (red;  $n=10$ ), *Homo erectus* (green;  $n=8$ ), and two *Homo heidelbergensis* individuals (black). Average endocranial shapes are shown in the respective group color. The between-group PCA scores of the MRI scans (orange) of living humans overlap with the modern human CT scans; the 99% confidence ellipse was computed for the MRI scans for which genetic data were also available ( $n=4,468$ ). **(C)** Globularity score for each individual based on data in (B) plotted for each group separately; *Homo erectus*, *H. heidelbergensis*, and *H. neanderthalensis* have lower scores than contemporary *H. sapiens*. The frequency plots at the bottom show that the globularity scores of modern human CT scans and MRI scans overlap. As the sample composition of this dataset differs from the one shown in Figure 2, the values of the globularity scores also differ — the overall pattern, however, remains consistent.

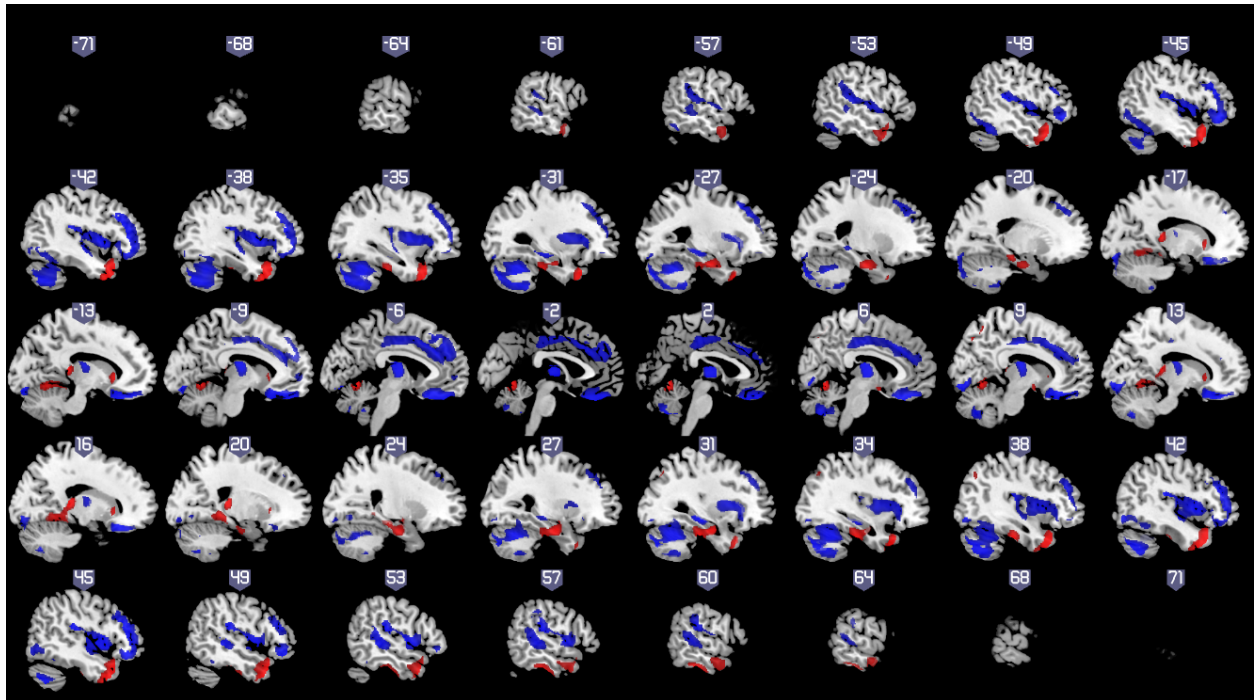

**Figure S2. Voxel-based morphometry (VBM), Related to STAR Methods.** VBM results of the gray matter (GM) analyses of variability in globularity in  $n=2,929$  subjects. Significant clusters formed by voxels with FWE-corrected peak-level  $p < 0.025$  and with a cluster size  $\geq 50$  voxels are shown. VBM analyses were adjusted for age (modeled continuously using restricted cubic splines), sex, ICV, and cohort. Red: Significant positive associations between GM and globularity; blue: significant negative associations between GM and globularity. See also Tables S1 and S2.

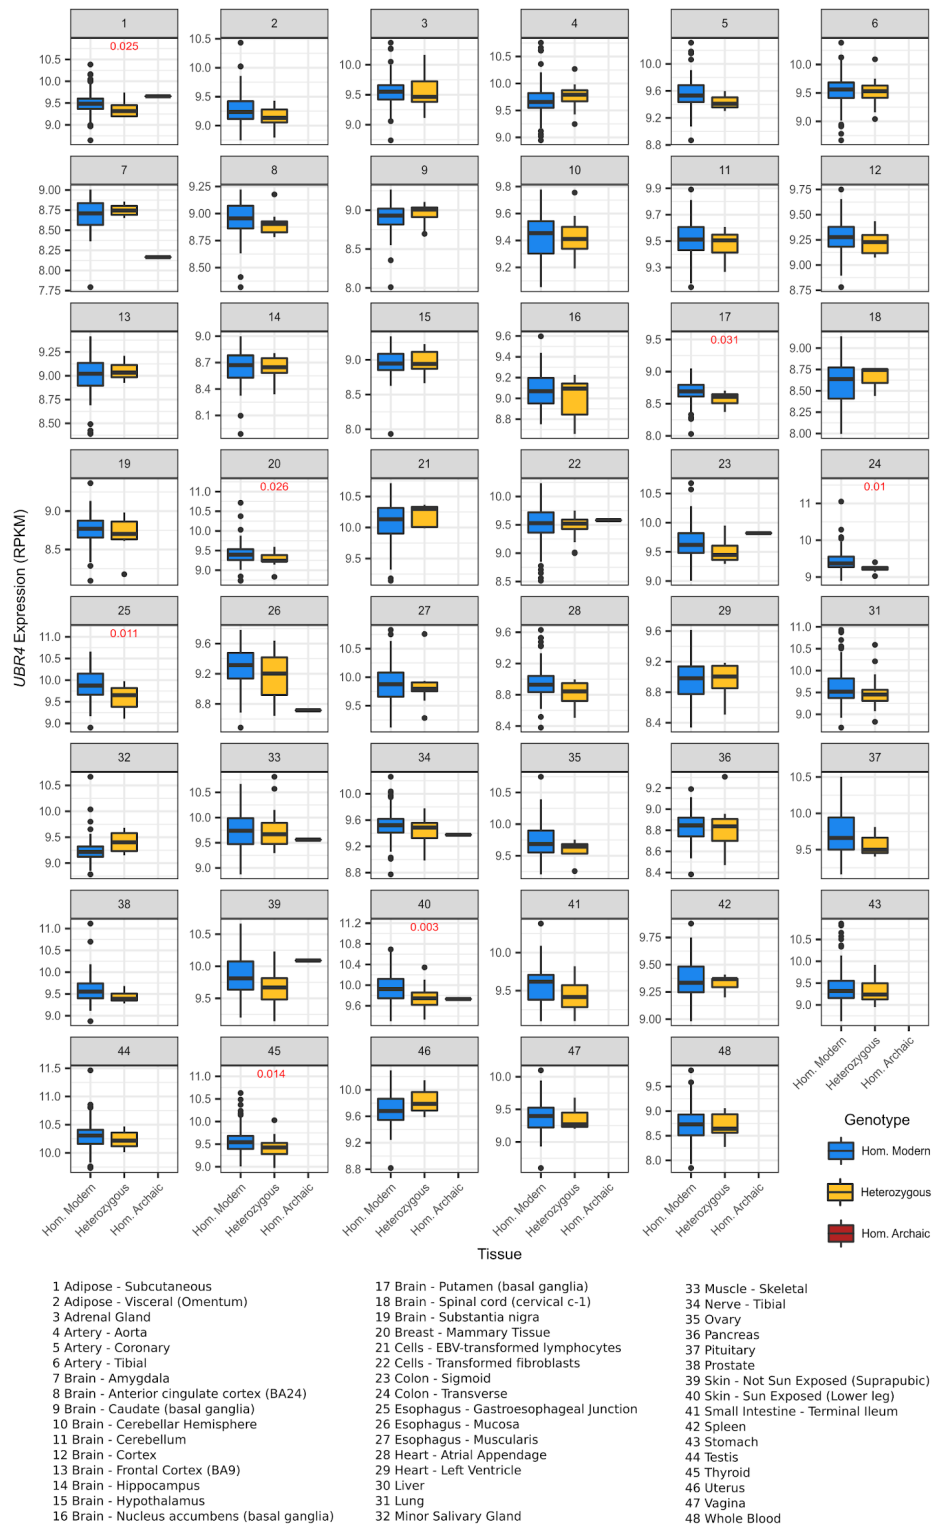

**Figure S3. Gene expression *UBR4*, Related to Figure 4.** Expression quantitative trait loci data from the GTEx resource, showing the impact of Neandertal alleles on gene expression for *UBR4*. Sample sizes are listed in Data S1.

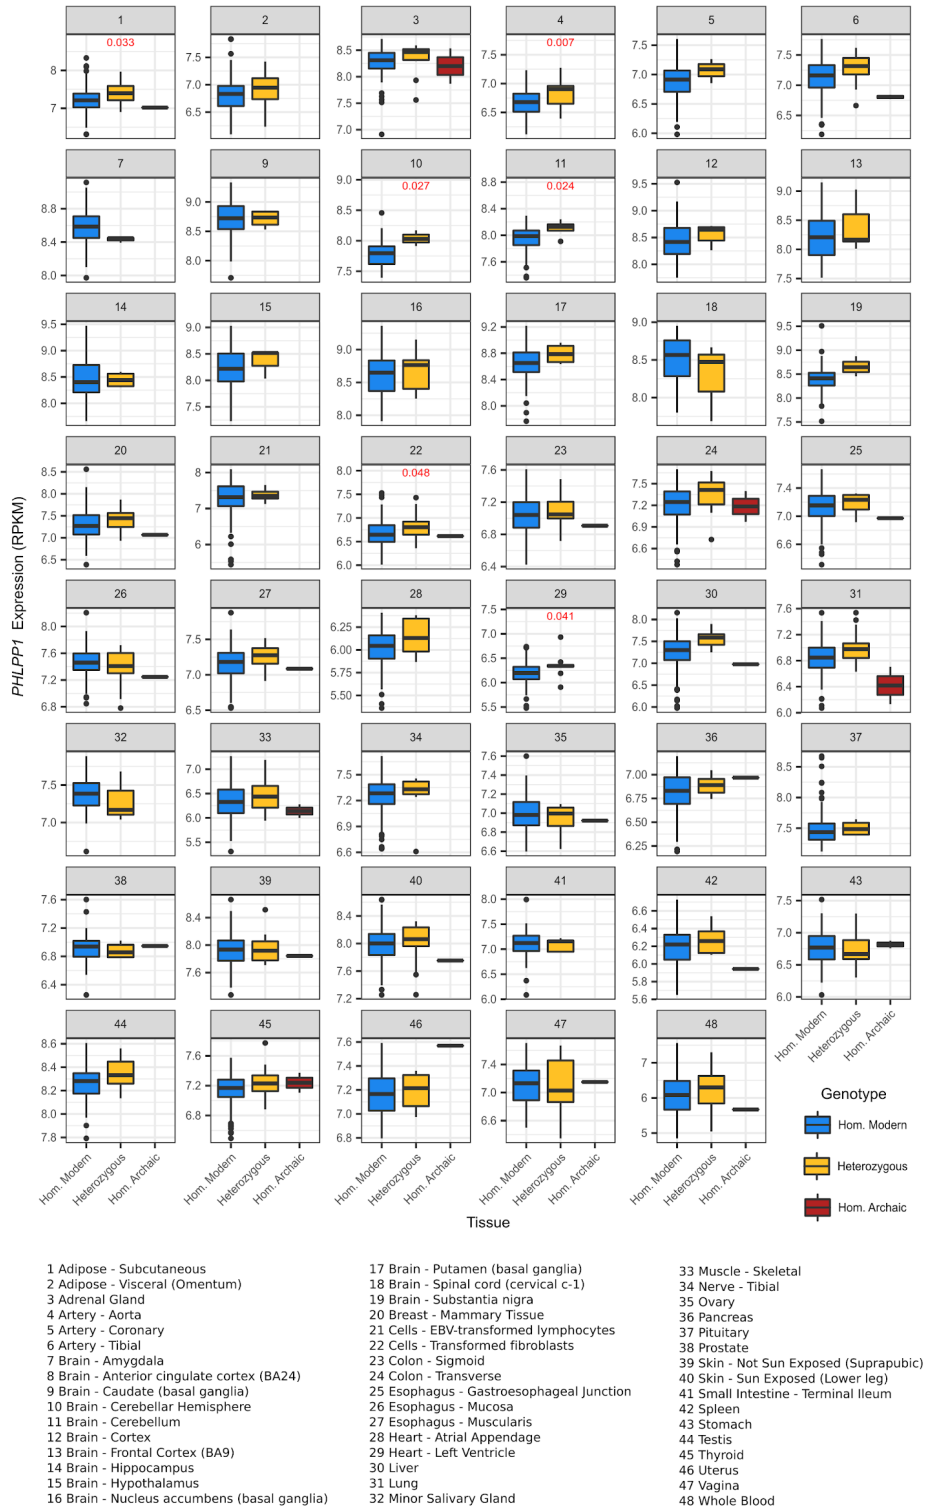

**Figure S4. Gene expression *PHLPP1*, Related to Figure 4.** Expression quantitative trait loci data from the GTEx resource, showing the impact of Neandertal alleles on gene expression for *PHLPP1*. Sample sizes are listed in Data S1.

| Cluster size<br>[voxel] | AAL-Regions                                                                                                                                                                                                                                                                                                    | Brodmann areas                 | $p_{\text{peak, FWE}}$                                               | t score                | Cohen's D            | Stereotaxic coordinates [in mm] |                   |                   |
|-------------------------|----------------------------------------------------------------------------------------------------------------------------------------------------------------------------------------------------------------------------------------------------------------------------------------------------------------|--------------------------------|----------------------------------------------------------------------|------------------------|----------------------|---------------------------------|-------------------|-------------------|
|                         |                                                                                                                                                                                                                                                                                                                |                                |                                                                      |                        |                      | x                               | y                 | z                 |
| 2264                    | L temporal pole (middle gyrus), L temporal pole (superior gyrus), L middle temporal gyrus, L inferior temporal gyrus, L fusiform gyrus                                                                                                                                                                         | 38, 21, 20, 47                 | $< 10^{-12}$<br>$2.50 \cdot 10^{-5}$<br>0.011                        | 12.40<br>5.93<br>4.71  | 0.46<br>0.22<br>0.17 | -38<br>-60<br>-50               | 21<br>0<br>-9     | -36<br>-24<br>-44 |
| 3984                    | R parahippocampal gyrus, R inferior temporal gyrus, R fusiform gyrus, R lingual gyrus, R hippocampus, L lingual gyrus, R Cerebellum 4_5, R thalamus, Vermis_4_5, L Cerebellum 4_5, L Cerebellum 6, Vermis_6, L parahippocampal gyrus, R amygdala, R precuneus, R Cerebellum 6, L fusiform gyrus, L hippocampus | 20, 19, 35, 36, 30, 28, 27, 34 | $< 10^{-12}$<br>$< 10^{-12}$<br>$< 10^{-12}$                         | 11.50<br>10.57<br>9.31 | 0.43<br>0.39<br>0.35 | 15<br>0<br>29                   | -33<br>-65<br>-12 | 11<br>-11<br>-26  |
| 2402                    | R temporal pole (middle gyrus), R middle temporal gyrus, R temporal pole (superior gyrus), R inferior temporal gyrus, R fusiform gyrus, R inferior frontal gyrus (orbital part)                                                                                                                                | 38, 21, 20, 47                 | $< 10^{-12}$<br>$< 10^{-12}$<br>$5.77 \cdot 10^{-6}$                 | 11.44<br>10.34<br>6.18 | 0.42<br>0.38<br>0.23 | 39<br>45<br>65                  | 23<br>15<br>-3    | -36<br>-41<br>-21 |
| 180                     | L thalamus, L hippocampus                                                                                                                                                                                                                                                                                      | -                              | $< 10^{-12}$                                                         | 9.96                   | 0.37                 | -14                             | -35               | 9                 |
| 879                     | L fusiform gyrus, L parahippocampal gyrus, L hippocampus, L amygdala, L Cerebellum 4_5, L inferior temporal gyrus, L Cerebellum 6                                                                                                                                                                              | 36, 35, 28, 20, 34             | $2.39 \cdot 10^{-12}$<br>$3.40 \cdot 10^{-10}$                       | 8.32<br>7.66           | 0.31<br>0.28         | -27<br>-35                      | -12<br>-27        | -26<br>-32        |
| 168                     | L caudate nucleus, L putamen                                                                                                                                                                                                                                                                                   | -                              | $1.12 \cdot 10^{-11}$                                                | 8.12                   | 0.30                 | -15                             | 21                | -2                |
| 118                     | R caudate nucleus, R putamen                                                                                                                                                                                                                                                                                   | -                              | $5.48 \cdot 10^{-9}$                                                 | 7.27                   | 0.27                 | 15                              | 21                | -2                |
| 58                      | R precuneus                                                                                                                                                                                                                                                                                                    | 7                              | $8.76 \cdot 10^{-7}$<br>$1.41 \cdot 10^{-5}$<br>$5.09 \cdot 10^{-4}$ | 6.50<br>6.03<br>5.36   | 0.24<br>0.22<br>0.20 | 9<br>9<br>9                     | -72<br>-60<br>-63 | 47<br>60<br>53    |
| 71                      | L inferior temporal gyrus                                                                                                                                                                                                                                                                                      | 34, 25                         | $9.81 \cdot 10^{-6}$                                                 | 6.09                   | 0.23                 | 8                               | 2                 | -15               |
| 54                      | R angular gyrus, R superior occipital gyrus, R middle occipital gyrus                                                                                                                                                                                                                                          | 7, 19, 39                      | $8.26 \cdot 10^{-4}$                                                 | 5.26                   | 0.20                 | 32                              | -69               | 45                |

**Table S1. Significant positive association of GM and Globularity, Related to STAR Methods.** VBM results of the gray matter analyses on globularity in n=2929 subjects. Significant clusters formed by voxels with FWE-corrected peak-level  $p < 0.025$  and with a cluster size  $\geq 50$  voxels are provided. VBM analyses were adjusted for age (modeled continuously using restricted cubic splines), sex, ICV, and cohort. AAL-Regions and Brodmann areas are listed according to the numbers of voxels they contribute to the respective cluster.

| Cluster size<br>[voxel] | AAL-Regions                                                                                                                                                                                                                                                                                                                                                                                 | Brodmann areas                                                     | $p_{\text{peak, FWE}}$ | t score | Cohen's D | Stereotaxic coordinates [in mm] |     |     |
|-------------------------|---------------------------------------------------------------------------------------------------------------------------------------------------------------------------------------------------------------------------------------------------------------------------------------------------------------------------------------------------------------------------------------------|--------------------------------------------------------------------|------------------------|---------|-----------|---------------------------------|-----|-----|
|                         |                                                                                                                                                                                                                                                                                                                                                                                             |                                                                    |                        |         |           | x                               | y   | z   |
| 1735                    | L thalamus, R thalamus                                                                                                                                                                                                                                                                                                                                                                      | -                                                                  | $< 10^{-12}$           | 13.24   | 0.49      | 0                               | -12 | 9   |
|                         |                                                                                                                                                                                                                                                                                                                                                                                             |                                                                    | $< 10^{-12}$           | 11.20   | 0.41      | -6                              | -17 | 18  |
|                         |                                                                                                                                                                                                                                                                                                                                                                                             |                                                                    | $< 10^{-12}$           | 10.65   | 0.39      | 8                               | -15 | 18  |
| 5433                    | R Cerebellum 6, R Cerebellum Crus1, R Cerebellum Crus2, R Cerebellum 8, R fusiform gyrus, R lingual gyrus, R inferior occipital gyrus, R Cerebellum 7b, R inferior temporal gyrus, R middle temporal gyrus, R Cerebellum 4_5, R calcarine fissure (and surrounding cortex), R middle occipital gyrus                                                                                        | 18, 37, 19, 17, 20                                                 | $< 10^{-12}$           | 11.21   | 0.42      | 42                              | -68 | -44 |
|                         |                                                                                                                                                                                                                                                                                                                                                                                             |                                                                    | $< 10^{-12}$           | 9.60    | 0.36      | 5                               | -81 | -8  |
|                         |                                                                                                                                                                                                                                                                                                                                                                                             |                                                                    | $< 10^{-12}$           | 9.31    | 0.35      | 30                              | -54 | -30 |
| 3571                    | L gyrus rectus, R gyrus rectus, L superior frontal gyrus (orbital part), R superior frontal gyrus (orbital part), L medial orbital frontal gyrus, L inferior frontal gyrus (orbital part), R medial orbital frontal gyrus, R olfactory cortex, L olfactory cortex, R inferior frontal gyrus (orbital part), L middle frontal gyrus (orbital part)                                           | 11, 47, 25, 32                                                     | $< 10^{-12}$           | 10.80   | 0.40      | -9                              | 24  | -24 |
|                         |                                                                                                                                                                                                                                                                                                                                                                                             |                                                                    | $< 10^{-12}$           | 10.38   | 0.38      | 9                               | 26  | -24 |
|                         |                                                                                                                                                                                                                                                                                                                                                                                             |                                                                    | $< 10^{-12}$           | 9.32    | 0.35      | -2                              | 45  | -27 |
| 8609                    | R insula, R middle frontal gyrus, R Rolandic operculum, R inferior frontal gyrus (orbital part), R inferior frontal gyrus (triangular part), R putamen, R supramarginal gyrus, R superior temporal gyrus, R inferior frontal gyrus (opercular part), R superior frontal gyrus, R temporal pole (superior gyrus), R middle frontal gyrus (orbital part), R Heschl gyrus                      | 13, 22, 40, 46, 47, 9, 10, 44, 43, 11, 6, 8, 21, 38, 45, 42, 2, 41 | $< 10^{-12}$           | 10.35   | 0.38      | 48                              | -29 | 17  |
|                         |                                                                                                                                                                                                                                                                                                                                                                                             |                                                                    | $< 10^{-12}$           | 10.20   | 0.38      | 42                              | 35  | 23  |
|                         |                                                                                                                                                                                                                                                                                                                                                                                             |                                                                    | $< 10^{-12}$           | 9.51    | 0.35      | 44                              | 9   | 0   |
| 8433                    | L insula, L middle frontal gyrus, L superior temporal gyrus, L inferior frontal gyrus (triangular part), L Rolandic operculum, L inferior frontal gyrus (orbital part), L supramarginal gyrus, L superior frontal gyrus, L Heschl gyrus, L middle frontal gyrus (orbital part), L inferior frontal gyrus (opercular part), L putamen, L temporal pole (superior gyrus), L postcentral gyrus | 13, 9, 22, 10, 47, 40, 8, 46, 41, 6, 11, 42, 43, 45, 21, 44        | $< 10^{-12}$           | 10.03   | 0.37      | -41                             | 35  | 21  |
|                         |                                                                                                                                                                                                                                                                                                                                                                                             |                                                                    | $< 10^{-12}$           | 9.47    | 0.35      | -44                             | 38  | -9  |
|                         |                                                                                                                                                                                                                                                                                                                                                                                             |                                                                    | $< 10^{-12}$           | 9.22    | 0.34      | -47                             | -32 | 15  |
| 200                     | R hippocampus, R parahippocampal gyrus                                                                                                                                                                                                                                                                                                                                                      | -                                                                  | $< 10^{-12}$           | 9.66    | 0.36      | 32                              | -23 | -11 |
| 6641                    | L Cerebellum Crus1, L Cerebellum Crus2, L Cerebellum 6, L Cerebellum 8, L inferior temporal gyrus, L fusiform gyrus, L inferior occipital gyrus, L lingual gyrus, L Cerebellum 7b, L Cerebellum 9, L middle occipital gyrus, L Cerebellum 4_5, L calcarine fissure (and surrounding cortex)                                                                                                 | 37, 18, 20, 19, 36                                                 | $< 10^{-12}$           | 9.50    | 0.35      | -9                              | -86 | -14 |
|                         |                                                                                                                                                                                                                                                                                                                                                                                             |                                                                    | $< 10^{-12}$           | 9.34    | 0.35      | -33                             | -54 | -30 |
|                         |                                                                                                                                                                                                                                                                                                                                                                                             |                                                                    | $< 10^{-12}$           | 8.67    | 0.32      | -39                             | -71 | -42 |
| 5668                    | R middle cingulate cortex, L middle cingulate cortex, L medial superior frontal cortex, R anterior cingulate cortex, L anterior cingulate cortex, L supplementary motor area, R supplementary motor area, R medial superior frontal cortex, L superior frontal gyrus                                                                                                                        | 32, 9, 24, 31, 8, 6, 10, 23                                        | $7.37 \times 10^{-12}$ | 8.17    | 0.30      | -9                              | 33  | 29  |
|                         |                                                                                                                                                                                                                                                                                                                                                                                             |                                                                    | $4.95 \times 10^{-11}$ | 7.92    | 0.29      | 8                               | -15 | 39  |
|                         |                                                                                                                                                                                                                                                                                                                                                                                             |                                                                    | $1.59 \times 10^{-10}$ | 7.77    | 0.29      | -8                              | 44  | 33  |
| 1226                    | R superior temporal gyrus, R middle temporal gyrus                                                                                                                                                                                                                                                                                                                                          | 22, 21, 13, 42                                                     | $2.72 \times 10^{-11}$ | 8.00    | 0.30      | 53                              | -35 | 0   |
|                         |                                                                                                                                                                                                                                                                                                                                                                                             |                                                                    | $5.01 \times 10^{-9}$  | 7.29    | 0.27      | 53                              | -36 | 14  |
| 792                     | R Cerebellum 8, Vermis_8, R Cerebellum 9, L Cerebellum 8, Vermis_9, L Cerebellum 9, Vermis_7, L Cerebellum Crus2, R Cerebellum Crus2, L Cerebellum 7b                                                                                                                                                                                                                                       | -                                                                  | $5.39 \times 10^{-11}$ | 7.91    | 0.29      | 6                               | -66 | -44 |
|                         |                                                                                                                                                                                                                                                                                                                                                                                             |                                                                    | $6.31 \times 10^{-11}$ | 7.89    | 0.29      | 18                              | -65 | -45 |
|                         |                                                                                                                                                                                                                                                                                                                                                                                             |                                                                    | $4.10 \times 10^{-10}$ | 7.64    | 0.28      | -3                              | -66 | -42 |
| 248                     | L hippocampus, L parahippocampal gyrus                                                                                                                                                                                                                                                                                                                                                      | 27                                                                 | $1.41 \times 10^{-10}$ | 7.78    | 0.29      | -30                             | -26 | -11 |

|     |                                                                                               |        |                       |      |      |     |     |    |
|-----|-----------------------------------------------------------------------------------------------|--------|-----------------------|------|------|-----|-----|----|
| 53  | R lingual gyrus, R fusiform gyrus                                                             | 18, 19 | $3.91 \times 10^{-6}$ | 6.25 | 0.23 | 21  | -72 | -6 |
| 263 | L middle temporal gyrus                                                                       | 22, 21 | $2.23 \times 10^{-4}$ | 5.52 | 0.20 | -53 | -35 | 5  |
|     |                                                                                               |        | $1.96 \times 10^{-3}$ | 5.09 | 0.19 | -60 | -30 | -3 |
|     |                                                                                               |        | $7.90 \times 10^{-3}$ | 4.78 | 0.18 | -56 | -38 | -5 |
| 92  | L medial superior frontal cortex, L anterior cingulate cortex, L medial orbital frontal gyrus | 10     | $4.49 \times 10^{-4}$ | 5.39 | 0.20 | -11 | 54  | 0  |

**Table S2. Significant negative association of GM and Globularity, Related to STAR Methods.** VBM results of the gray matter analyses on globularity in n=2929 subjects. Significant clusters formed by voxels with FWE-corrected peak-level  $p < 0.025$  and with a cluster size  $\geq 50$  voxels are provided. VBM analyses were adjusted for age (modeled continuously using restricted cubic splines), sex, ICV, and cohort. AAL-Regions and Brodman areas are listed according to the numbers of voxels they contribute to the respective cluster.



|                              | BIG†            |            |              | SHIP-2          |           |              | SHIP-TREND     |           |              |
|------------------------------|-----------------|------------|--------------|-----------------|-----------|--------------|----------------|-----------|--------------|
|                              | <i>n</i> = 2433 |            |              | <i>n</i> = 1139 |           |              | <i>n</i> = 896 |           |              |
|                              | <i>Est.</i>     | <i>p</i>   | <i>Stat.</i> | <i>Est.</i>     | <i>p</i>  | <i>Stat.</i> | <i>Est.</i>    | <i>p</i>  | <i>Stat.</i> |
| Age                          | 0.141           | 3.727 e-12 | 6.983        | 0.304           | <2.2 e-16 | 10.766       | 0.296          | <2.2 e-16 | 9.268        |
| Sex                          | -0.0833         | 4.179 e-05 | -4.105       | -0.0027         | 0.9269    | -0.092       | 0.0479         | 0.152     | 1.434        |
| <i>Intracranial volume</i>   | -0.0191         | 0.349      | -0.936       | 0.0678          | 0.022     | 2.290        | -0.0138        | 0.681     | -0.412       |
| <i>Total white-matter</i>    | -0.0128         | 0.529      | -0.630       | 0.0668          | 0.024     | -2.257       | -0.0234        | 0.485     | -0.699       |
| <i>Total grey-matter</i>     | -0.0214         | 0.294      | -1.0495      | -0.0202         | 0.495     | -0.683       | -0.0939        | 0.005     | -2.818       |
| <i>Cerebellar volume</i>     | -0.0823         | 5.255 e-05 | -4.0513      | -0.0095         | 0.749     | -0.321       | -0.0908        | 0.007     | -2.725       |
| <i>Depression</i>            |                 |            |              | -0.0197         | 0.54      | -0.613       | -0.0419        | 0.211     | -1.252       |
| <i>Tobacco Use (current)</i> |                 |            |              | 0.0156          | 0.629     | 0.483        | -0.0433        | 0.197     | -1.292       |
| <i>Tobacco Use (ever)</i>    |                 |            |              | -0.0328         | 0.308     | -1.0192      | -0.0426        | 0.204     | -1.272       |

**Table S3. Correlations between endocranial globularity and demographic or MRI-derived variables, Related to STAR Methods.** Variables in *italics* are controlled for the effect of age. † Variables in the BIG cohort were also controlled for sex and differing scanner parameters.

## Supplemental References

S1. Neubauer, S., Hublin, J.J., Gunz, P. (2018). The evolution of modern human brain shape. *Sci Adv* 4, eaao5961.
